# Membrane cholesterol interferes with tyrosine phosphorylation but facilitates the clustering and signal transduction of EGFR

## Authors

Michio Hiroshima<sup>1,2,\*</sup>, Mitsuhiro Abe<sup>2</sup>, Nario Tomishige<sup>3</sup>, Françoise Hullin-Matsuda<sup>4</sup>, Asami Makino<sup>2</sup>, Masahiro Ueda<sup>1,5</sup>, Toshihide Kobayashi<sup>3</sup>, and Yasushi Sako<sup>2</sup>

## Affiliations

<sup>1</sup>*Laboratory for Cell Signaling Dynamics, RIKEN BDR, 6-2-3, Furuedai, Suita, Osaka, 565-0874, Japan.*

<sup>2</sup>*Cellular Informatics Laboratory, RIKEN CPR, 2-1 Hirosawa, Wako 351-198, Japan.*

<sup>3</sup>*Laboratory of Bioimaging and Pathologies, University of Strasbourg, 74 route du Rhin, CS 60024-67401 Illkirch, France*

<sup>4</sup>*CarMeN Laboratory, University of Lyon, Inserm U1060, INRAe U1397, Université Claude Bernard Lyon 1 Pierre-Bénite, France*

<sup>5</sup>*Laboratory of Single Molecule Biology, Graduate School of Frontier Biosciences, Osaka University, 1-3 Yamadaoka, Suita, Osaka 565-0871, Japan.*

## \* Corresponding Author

Correspondence should be addressed to Michio Hiroshima (m\_hiroshima@riken.jp).

## Summary

Epidermal growth factor receptor (EGFR) activates major cell signaling pathways that regulate various cell responses. Its dimerization and clustering coupled with its lateral mobility are critical for EGFR function, but the contribution of the plasma membrane environment to EGFR function is unknown. Here we show, using single-molecule analysis, that EGFR mobility and clustering are altered by the depletion of cholesterol or sphingomyelin, major lipids of membrane subdomains, causing significant changes in EGFR signaling. When cholesterol was depleted, the subdomain boundary in EGFR diffusion disappeared, the fraction of EGFR pre-dimers was increased, and the ligand-induced phosphorylation of EGFR was enhanced. In addition, the depletion of either lipid prevented the formation of immobile clusters after EGF association and decreased the phosphorylation of downstream proteins. Our results revealed that cholesterol plays dichotomous roles in the signaling pathway of EGFR and that clustering in the membrane subdomains is critical for EGFR signal transduction.

## 1 **Introduction**

2 Epidermal growth factor receptor (EGFR), a receptor tyrosine kinase, is a major  
3 regulator of several intracellular signaling cascades by receiving extracellular ligands at  
4 the plasma membrane. EGFR signaling transfers information to the well-known RAS-  
5 MAPK pathway, inducing essential cell responses such as proliferation, differentiation,  
6 migration, apoptosis, and others. Defects in EGFR function affect cellular responses,  
7 often inducing hyperactivated signaling to causes carcinoma and other diseases  
8 (Carpenter et al., 1978; Lemmon and Schlessinger, 2010). Ligand-bound EGFR is auto-  
9 phosphorylated when EGFR takes a dimer structure to activate downstream signaling.  
10 Even before the ligand binding, dimer formation (pre-dimer) occurs (Hiroshima et al.,  
11 2012, 2018; Martin-Fernandez et al., 2002; Teramura et al., 2006; Yu et al., 2002), but  
12 usually the dimer cannot evoke whole cell activation and instead results in only higher  
13 ligand-affinity than the monomer. The ligand binding alters the pre-dimer state to an  
14 active dimer state capable of auto-phosphorylation. Previous studies have also indicated  
15 the existence of receptor pre-clusters larger than the dimer (Tao and Maruyama, 2008;  
16 Webb et al., 2008). Since the dimerization and cluster formation are driven by a  
17 molecular collision during diffusion along the plasma membrane, the membrane  
18 environment is reflected in the EGFR behavior (Arkhipov et al., 2013; Lin et al., 2016;  
19 Valley et al., 2015) and affects the EGFR signaling (Lajoie et al., 2007). To elucidate  
20 the membrane environment effects, observation of the spatiotemporal behaviors of  
21 individual EGFR molecules in cells is necessary.

22         Single-molecule trajectory analysis combined with the hidden Markov model  
23 (HMM) based on machine learning methods (Okamoto and Sako, 2012; Rabiner, 1989)  
24 has been used to infer molecular state transitions along the trajectory of an individual  
25 molecule (Chung et al., 2010; Low-Nam et al., 2011; Persson et al., 2013). EGFR was  
26 shown to transit between three motional states; namely, immobile, slow-, and fast-

27 mobile, which were determined in terms of the size of the diffusion coefficient  
28 (Hiroshima et al., 2018; Yasui et al., 2018). We previously found that EGFR molecules  
29 in the slow-mobile state showed a confined diffusion surrounding the trajectory of the  
30 immobile state in which the position of the molecules fluctuated within a confined area  
31 (~60 nm) only two times larger than the localization accuracy. Fast-mobile EGFR  
32 molecules moved in space between the slow-mobile compartment with simple diffusion.  
33 The clustering states, which correspond to the number of EGFR molecules moving  
34 together, were determined from the brightness of the GFP fluorescence probing EGFR.  
35 After EGF stimulation, the EGFR clustering state shifted initially from monomer to  
36 dimer and subsequently to larger clusters concurrent with a shift to a slower mobility  
37 state. Immobile clusters are the primary interaction sites with the downstream protein  
38 GRB2. The dissociation kinetics between EGFR and GRB2 is specifically slower in  
39 immobile clusters, suggesting they play a significant role in the signal transduction in  
40 cells (Hiroshima et al., 2018). Overall, these results suggested that lateral mobility,  
41 clustering, and signal activation are closely correlated in EGFR.

42         The confinement size of the slow-mobile diffusion we have observed (~200 nm)  
43 is equivalent to the size often reported for lipid rafts (a membrane subdomain), which  
44 are a liquid-ordered phase segregated from the bulk region (liquid disordered phase) of  
45 the plasma membrane (Semrau and Schmidt, 2009). However, little is understood about  
46 the relationship between EGFR behavior and the membrane environment. Cholesterol  
47 and sphingomyelin are well-known major components of lipid rafts and can be depleted  
48 from the plasma membrane by treatment with methyl- $\beta$ -cyclodextrin (M $\beta$ CD), which  
49 extracts cholesterol from the membrane to its hydrophobic cavity (Zidovetzki and  
50 Levitan, 2007), or sphingomyelinase (SMase), which catalyzes the breakdown of  
51 sphingomyelin to phosphorylcholine and ceramide; ceramide is then converted to  
52 sphingosine and sphingosine-1-phosphate (S1P) and transported out of the cells  
53 (Hannun and Obeid, 2008; Sasset et al., 2016). M $\beta$ CD and sphingomyelinase treatments

54 have been reported to disperse and affect the physical properties of lipid rafts,  
55 respectively (Cremesti et al., 2002; Smith et al., 2010), indicating they alter EGFR  
56 behavior. These perturbations offer information on how cellular signaling is affected by  
57 the plasma membrane environment through the dynamics of EGFR behavior at the  
58 molecular level.

59 To understand the dependency of EGFR behavior, including the localization,  
60 mobility, clustering, and their coupling, on the membrane structure, the present study  
61 employed single-molecule analysis while depleting cholesterol or sphingomyelin.  
62 Furthermore, assessments of the receptor and its downstream activity were carried out  
63 to reveal the correlation between EGFR behavior and cellular signaling.

## 64 **Results**

### 65 **Cholesterol- but not sphingomyelin-depletion enhanced EGF-induced EGFR** 66 **phosphorylation**

67 CHO-K1 cells were transfected with EGFR-GFP and treated with M $\beta$ CD or  
68 sphingomyelinase for the lipid depletion. Cholesterol was reduced to 33% and 16% with  
69 5 and 10 mM M $\beta$ CD treatment, respectively, according to GC-FID or GC-MS  
70 measurements (Fig. 1a). Similar depletion was also confirmed by the exogenous  
71 addition of fluorescent EGFP-labeled  $\theta$  toxin, a probe of free cholesterol (Fig. 1b), that  
72 binds to the cells. Sphingomyelin was reduced to 18% by sphingomyelinase treatment  
73 (Fig. 1b) based on the fluorescence of GFP-labeled lysenin, a specific probe of  
74 sphingomyelin (Fig. 1b). The observed fluorescence of  $\theta$  toxin-GFP in  
75 sphingomyelinase-treated cells and lysenin-GFP in M $\beta$ CD-treated cells were the same  
76 as in non-treated cells (Fig. S1), indicating that the specific depletion of one lipid  
77 neither affected the content of the other lipid in cells.

78 The time-course of EGFR phosphorylated at Y1173 in cholesterol-depleted and  
79 control cells reached a maximum at 1-3 minutes after EGF stimulation according to  
80 Western blotting results (Fig. 1c and S2a). The phosphorylation level under cholesterol-  
81 depletion was higher than that in the control condition and was dependent on the M $\beta$ CD  
82 concentration. The phosphorylation of EGFR at Y1173 and Y1068 was increased by the  
83 cholesterol depletion two minutes after the stimulation (Fig. 1d). The half-maximal  
84 effective concentrations (EC<sub>50</sub>) of EGF was almost the same between control and  
85 cholesterol-depleted conditions: 1.9 nM and 2.1 nM for pY1173, and 1.5 nM and 1.3  
86 nM for pY1068, respectively. Hill coefficients indicating no cooperativity (0.6-1.0)  
87 were not changed by the depletion. After 30 nM EGF stimulation, the cholesterol-  
88 depletion condition induced 1.8-fold and 2.7-fold higher phosphorylation of Y1068 and

89 Y1173, respectively, compared with the control condition (Fig.1e and S2b).

90 Sphingomyelin depletion did not affect the phosphorylation of Y1068 or Y1173

91 significantly (Fig. 1e).

92 **Fig. 1**

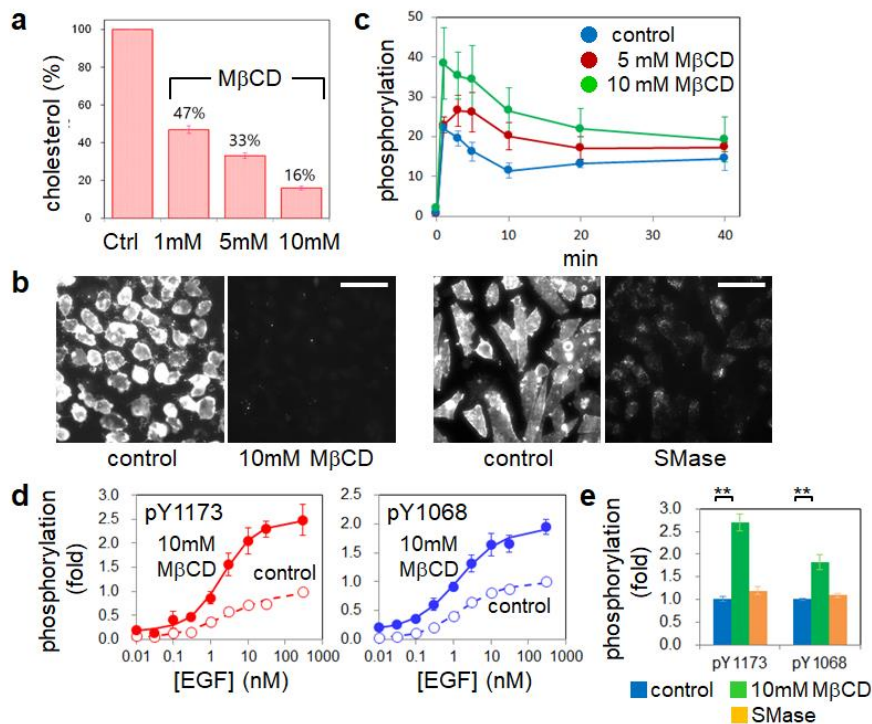

93 **Lipid-depletion and EGFR phosphorylation. a.** Cholesterol content in MβCD-treated

94 cells. The amount of cholesterol was normalized to that in non-treated cells. **b.**

95 Fluorescence images of wild-type CHO-K1 cells labeled with GFP-conjugated lipid

96 probes. Left:  $\theta$  toxin-labeled cells. Right: Lysenin-labeled cells. Scale bars, 50  $\mu$ m. **c.**

97 Time-course of the EGF-induced EGFR phosphorylation (pY1173) (n = 3 trials). Fold-

98 changes relative to phosphorylation at 0 min are indicated. **d.** Dose-response curves for

99 EGF-induced tyrosine phosphorylation in EGFR. **e.** Comparison between the

100 phosphorylation levels at 2 min after 30 nM EGF stimulation. \*\* p < 0.01 (t-test). **a-e,**

101 Error bars: SE. All data points are shown in Fig. S2.

102

### 103 **Cholesterol-depletion enlarged the slow-mobile region before EGF stimulation**

104 To understand how the differences in phosphorylation arose among the control and  
105 cholesterol-depleted conditions with consideration of EGFR behavior, we applied  
106 single-molecule imaging of EGFR-EGFP on the plasma membrane of living cells. We  
107 analyzed the trajectories of individual fluorescent spots using an HMM-based machine  
108 learning method to assign every step along the trajectories with specific motional and  
109 clustering states. The movements consisted of immobile, slow-, and fast-mobile states in  
110 all lipid conditions (Fig. S3 and Table S1). The depletion of either lipid increased the  
111 diffusion coefficient in the immobile state and the fraction of the slow-mobile state  
112 while decreasing the fraction of the fast-mobile state. Sphingomyelin depletion also  
113 increased the diffusion coefficient of the fast-mobile state. The observed changes in the  
114 diffusion coefficients were consistent with previous reports indicating that membrane  
115 fluidity is reduced by the addition of cholesterol (Tabas, 2002) or sphingomyelin  
116 (Makdissy et al., 2015). Trajectories of the lateral motion (Fig. 2) showed that  
117 cholesterol-depletion enlarged the diffusion region especially during the slow-mobile  
118 state (Fig. 2a, orange) but that the sphingomyelin-depletion had little effect. These  
119 trajectories reflect the properties of the time evolution of the mean square displacement  
120 (MSD; Fig. 2b and S4).

121 MSD profiles of confined and simple diffusion were fitted with the following  
122 equations, respectively,

$$123 \quad MSD = L^2/3 \left\{ 1 - \exp\left(-12 \frac{D_1 t}{L^2}\right) \right\}, \quad (\text{Eq. 1})$$

$$124 \quad MSD = 4D_2 t, \quad (\text{Eq. 2})$$



125 where  $D_1$  and  $D_2$  are the diffusion coefficients,  $L$  is the confinement length, and  $t$  is the  
126 diffusion time. The suitable diffusion mode for each MSD profile was determined using  
127 Akaike's information criterion (AIC), which was calculated using the equation below,

$$128 \quad AIC = \text{Log} \left( \frac{RSS}{N} \right) + 2k/N, \quad (\text{Eq. 3})$$

129 where  $RSS$  is the residual sum of squares between the data and the model,  $N$  is the  
130 number of data points, and  $k$  is the number of parameters. The model with the higher  
131 AIC was selected. In the control condition, confined diffusion was observed in the  
132 immobile and slow-mobile states, but the fast-mobile state showed simple diffusion.  
133 The confinement lengths ( $L$ ) of the immobile state were 60 nm for all cluster sizes  
134 (monomer, dimer, and higher-order clusters).  $L$  for the slow-mobile state was equivalent  
135 to the size of well-known membrane subdomains (including lipid rafts). Finally, the  
136 mobility of the monomer (~310 nm) was more confined than the mobility of the other  
137 clusters (~570 nm).

138         When cholesterol was depleted, the diffusion mode in the slow-mobile state was  
139 altered from confined to simple diffusion for all cluster sizes. The cholesterol depletion  
140 had little effect on the MSD of both the immobile and fast-mobile states or on the  
141 distance between the centers of the immobile state regions (Fig. S5). When  
142 sphingomyelin was depleted, the slow mobile EGFR still showed confined diffusion,  
143 but the confinement was less in comparison with the control condition (~720 nm for  $\geq$   
144 dimer). In Fig. 2c, individual trajectories were superimposed to exhibit the expanding  
145 diffusion area of EGFR, for which the center of the first immobile state in each  
146 trajectory was shifted to the origin. The second and later immobile states are seen as  
147 small islands separated from the first region, and the slow- and fast-mobile states were  
148 distributed around the immobile states (Fig. 2c, left). Typical trajectories (Fig. 2c, right)  
149 rarely showed a direct transition between the immobile and fast-mobile states, as

150 observed in the transition probability (Table S1). Transitions between the immobile and  
151 slow-mobile states often occurred at the surrounding boundary of the region for an  
152 immobile state, suggesting that an EGFR particle in the immobile state was trapped  
153 within a 60-nm membrane subdomain that was stable during the observation time.  
154 Boundaries between the slow-mobile and fast-mobile regions were obscure. Thus, the  
155 small core area surrounded by a region several hundred nanometers wide forms a  
156 membrane subdomain in which EGFR molecules are confined. In the space between the  
157 subdomains, EGFR molecules are allowed to diffuse in the fast-mobile state. The  
158 cholesterol depletion loosens the confinement and enlarges the range of slow-mobile  
159 motion (Fig. 2c, left middle), possibly leading to occasional subdomain fusion. In the  
160 case of sphingomyelin-depletion, slight expansion of the diffusion area was observed  
161 (Fig. 2c, left bottom), reflecting the increase in both the confinement length of the slow-  
162 mobile state and the diffusion coefficient of the fast-mobile state.

163 **Fig. 2**

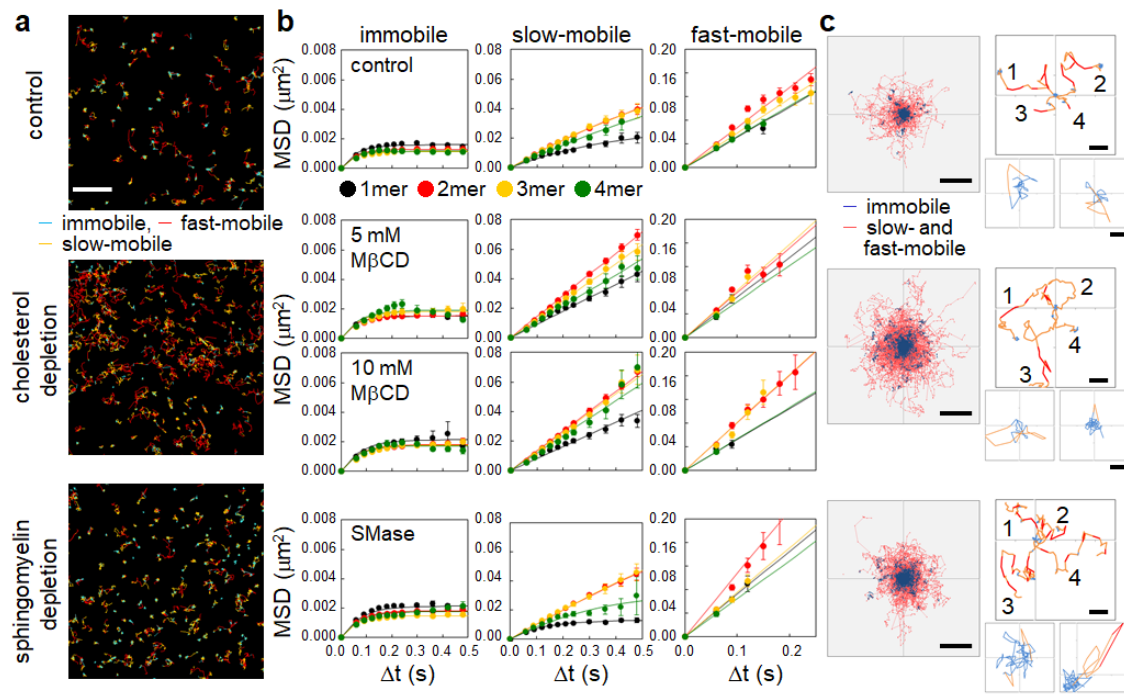

164 **Lipid-depletion and EGFR mobility in the absence of EGF.** **a.** Trajectories of EGFR  
165 particles in three state transitions. Scale bar, 2  $\mu\text{m}$ . **b.** MSD- $\Delta t$  plots for each motional  
166 and clustering state. Data are shown as the mean and SE. All single-cell data points are  
167 shown in Fig. S4. **c.** Trajectories of 500 particles up to 50 frames (1.5 sec) originated  
168 from the immobile region were superimposed (left). Scale bar, 500 nm. Typical  
169 trajectories were extracted in the right panels. The number denotes each trajectory.  
170 Scale bars, 300 nm. In the smaller panels, trajectories that came back to the identical  
171 immobile region are shown. Scale bars, 50 nm.

172

173 **Cholesterol depletion increased the slow-mobile EGFR pre-dimer.**

174 The cluster size distribution, which was obtained from the HMM analysis, showed that  
175 EGFR dimer and higher-order clusters existed even without ligand stimulation and thus  
176 could be called pre-dimer and pre-clusters, respectively. The pre-dimer is responsible  
177 for increasing the sensitivity of EGF signaling (Hiroshima et al., 2012; Teramura et al.,  
178 2006), but spontaneous auto-phosphorylation hardly occurs. Ligand binding alters the  
179 pre-dimer to an active configuration (Hofman et al., 2010), enabling auto-  
180 phosphorylation. We found that when cholesterol was depleted, the fraction of pre-  
181 dimer in the slow-mobile state was significantly increased (1.4-fold), but the fractions of  
182 monomers and higher-order clusters ( $\geq$  trimer) were unchanged (Fig. 3a and S6),  
183 suggesting an upshift in dimerization affinity between EGFR monomers and the  
184 destabilization of clusters to the dimer. The fractions from monomer to tetramer were  
185 reduced in the fast-mobile state, but no change was observed in the immobile state  
186 (Table S2). These changes increased the total slow-mobile fraction 1.3-fold (Fig. S3b  
187 and Table S1).

188           We calculated the influx and efflux of monomers and pre-dimers from the  
189 immobile and fast-mobile states to the slow-mobile state based on the HMM analysis  
190 (Tables S1 and S2). In the control condition, a significant net efflux of monomers ( $0.27$   
191  $\pm 0.05\%$   $s^{-1}$ ) was observed from the slow-mobile state, but there was no significant  
192 influx or efflux of the dimers. Under cholesterol-depletion, influx and efflux were  
193 balanced both for monomers and dimers in the slow-mobile state, thus producing no net  
194 flux. Although the decreased efflux of the monomer fraction from the slow-mobile state  
195 under cholesterol-depletion can induce pre-dimer formation, considering the 11.5%  
196 fraction of the slow-mobile state, this effect is small within the reaction time  
197 (subsecond) of the dimerization and decomposition (see below). However, this  
198 decreased efflux increased the fraction of the slow-mobile state. Because 49% and 63%  
199 of pre-dimer formations were observed during the slow-mobile state in the control and  
200 cholesterol-depleted conditions, respectively, the increase in the slow-mobile fraction  
201 increased the fraction of pre-dimers in the cholesterol-depletion condition. Transitions  
202 in the motional states correlated neither with the pre-dimer formation nor the  
203 decomposition.

204           We also measured the reaction rate constants of dimerization and dimer  
205 decomposition. The 1st-order dimerization rate constants in the slow-mobile state, were  
206 calculated from the frequency of dimerization events and found to be  $7.3 \pm 0.5 s^{-1}$  (123  
207 cells) in the control condition and  $7.4 \pm 0.4 s^{-1}$  (69 cells) in the cholesterol-depleted  
208 condition. The difference was not statistically significant. The decomposition rate  
209 constants were  $7.6 \pm 0.05 s^{-1}$  under the control condition and  $6.1 \pm 0.06 s^{-1}$  in the  
210 cholesterol-depleted condition, which was a significant difference (Table S3). The total  
211 density of fluorescent particles on the cell surface ( $1.4 \pm 0.7 \mu m^{-2}$ ) was not affected by  
212 the cholesterol depletion. When this particle density was applied to the region for slow-  
213 mobile motion, the fractions of monomers and dimers in the slow-mobile state were  
214 converted into particle densities of  $0.32 \pm 0.02 \mu m^{-2}$  and  $0.67 \pm 0.04 \mu m^{-2}$  in the control

215 condition, and  $0.28 \pm 0.02 \mu\text{m}^{-2}$  and  $0.74 \pm 0.04 \mu\text{m}^{-2}$  in the cholesterol-depletion  
216 condition and resulted in dissociation constants ( $K_d$ ) of  $0.33 \pm 0.02 \mu\text{m}^{-2}$  and  $0.23 \pm 0.02$   
217  $\mu\text{m}^{-2}$ , respectively. Here, the decrease in the dissociation rate constant, i.e., the increase  
218 in the stability of pre-dimers, mainly contributed to the increased pre-dimer formation  
219 under the cholesterol depletion. Furthermore, the destabilization of the EGFR clusters  
220 suggested above may have another cause to increase the pre-dimer fraction.

221         Next, we checked locations of the pre-dimer formation relative to the center of  
222 the first immobile region along the single-molecule trajectories. The frequency of  
223 dimerization events per area in the slow- and fast-mobile states was mapped in two  
224 dimensions and averaged over the circumference (Fig. 3b). Reflecting the release from  
225 confinement (Fig. 2b), the pre-dimerization locations spread further away when  
226 cholesterol was depleted (“M $\beta$ CD” in Fig. 3b). Most of the molecules traveled to the  
227 next immobile region (long-traveled; Fig. 3c) and formed pre-dimers regardless of the  
228 lipid condition (Fig. 3d). In the absence of EGF, the long-traveled fraction was largest  
229 upon cholesterol-depletion (Fig. 3e). Dimerization and higher-order clustering also  
230 occurred more frequently in the long-traveled fraction (Fig. 3f). These results suggest  
231 that cholesterol-depletion spreads the pre-dimers and pre-clusters (Fig. S7a) of EGFR  
232 over a large region of the plasma membrane.

233         On the other hand, sphingomyelin-depletion caused no obvious change  
234 regarding the EGFR clustering, such as the fraction distribution (Fig. 3a and S6),  
235 reaction rate constants (Tables S1 and S2), location of the dimerization (Fig 3b, d, and  
236 f), or fraction of long-traveled molecules (Fig. 3d).

237

238

239 **Fig. 3**

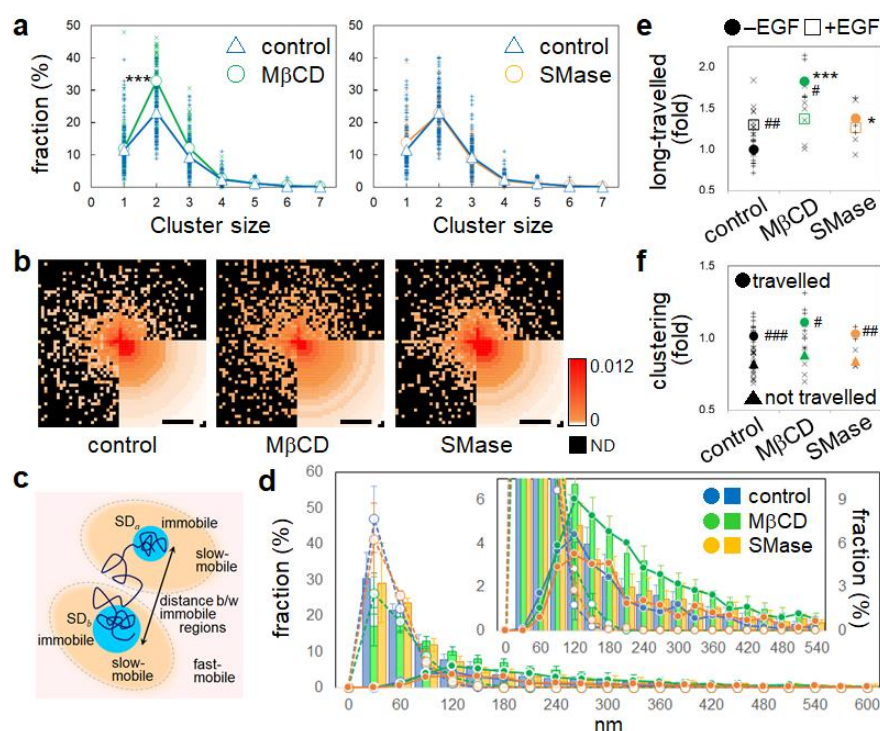

240 **Lipid-depletion and EGFR pre-dimerization.** **a.** Fractions of clusters belonging to the  
 241 slow-mobile state. Averages (circles and triangles) and single-cell data (+, ×) are shown.  
 242 **b.** Locations of pre-dimer formation of the mobile (slow and fast) EGFR molecules  
 243 relative to the center of the first immobile region in each trajectory. The color code  
 244 indicates the number of events ( $\text{trajectory}^{-1} \text{ s}^{-1}$ ). Scale bars, 500 nm. **c.** A schematic  
 245 illustration of an EGFR trajectory. Movements longer than the distance between two  
 246 immobile regions are called “long-traveled”. **d.** Distribution of the traveling distances  
 247 during 1.5 sec (circles; left scale) and normalized frequencies of pre-dimer formation  
 248 (bars; right scale) during the slow- and fast-mobile states (percentage of total events).  
 249 Dots indicate distributions for the long-traveled EGFR molecules, and hollow circles  
 250 indicate other molecules. Inset: the distributions with small fractions are magnified. **e.**  
 251 Relative fractions of long-traveled EGFR moved out of an immobile region during the  
 252 observation period. **f.** Fractions of EGFR molecules with clustering ( $\geq$  dimer) in the  
 253 mobile state after moving out of an immobile region (-EGF). In **e** and **f**, the fractions are

254 normalized to control cells. \*\*\* and \*  $p < 0.001$  and  $< 0.05$  (t-test), respectively,  
255 between control and lipid-depleted conditions. ####, ##, and #  $p < 0.001$ ,  $< 0.01$ , and  $<$   
256  $0.05$  (t-test), respectively, between before and after EGF stimulation.

257

## 258 **Cholesterol- or sphingomyelin-depletion inhibited EGF-induced clustering of** 259 **EGFR**

260 We quantitatively described the extent of EGF-induced clustering as the ratio of cluster  
261 fractions before and after EGF stimulation (Figs. 4a and S8a) and noticed obvious  
262 effects of the lipid depletion in the immobile state. In the control condition, the ratio for  
263 the same sized clusters larger than dimers was increased up to 7.0-fold, indicating that  
264 EGF stimulation reinforced higher-order clustering. When either cholesterol or  
265 sphingomyelin was depleted, this increase was strongly inhibited (only up to 2.5-fold),  
266 indicating that lipids facilitate the EGF-induced cluster formation. At the same time, the  
267 EGF-induced expansion of the locations of clustering ( $\geq$  trimer) was observed under the  
268 control condition but not under lipid-depletion (Fig. 4b). However, the area of the EGF-  
269 induced dimerization was similar under all lipid conditions (Fig. S7b). The EGF-  
270 induced dimerization during long traveling occurred at the same frequency between all  
271 lipid conditions (Fig. 4c), whereas higher-order clustering was facilitated by EGF only  
272 in the control condition (Fig. 4d) in parallel with the increase in long-traveled molecules  
273 (Fig. 3e).

274 Changes in the cluster size distributions (Fig. 4a and S8) indicate that EGFR  
275 molecules were immobilized at the same time as higher-order clustering in the control  
276 condition. We previously reported that EGF stimulation of cells transiently releases the  
277 confinement of the slow-mobile diffusion at the very early stage ( $\sim 30$  sec), then shrinks  
278 the area of the confined diffusion of EGFR at the early stage (1~2 min). EGFR clusters

279 were formed during this biphasic mobility change (Hiroshima et al., 2018), which  
 280 depends on the EGF concentration (Yasui et al., 2018). Our observations in the present  
 281 study confirmed that EGF induces clustering of long-traveled particles and shrinks the  
 282 area for the slow-mobile state under the control and sphingomyelin-depleted conditions  
 283 (Fig. 4e and S4) and reduced the confinement lengths to  $\sim 160$  (monomer) and  $\sim 340$  nm  
 284 ( $\geq$  dimer) and  $\sim 160$  (monomer) and  $\sim 530$  nm ( $\geq$  dimer), respectively (Table S1). Even  
 285 for molecules in the slow-mobile state moving without confinement under cholesterol-  
 286 depletion, the diffusion coefficient and MSD were significantly decreased by EGF. The  
 287 EGF-induced reduction in EGFR mobility was independent of higher-order clustering  
 288 and not regulated by cholesterol or sphingomyelin.

289 **Fig. 4**

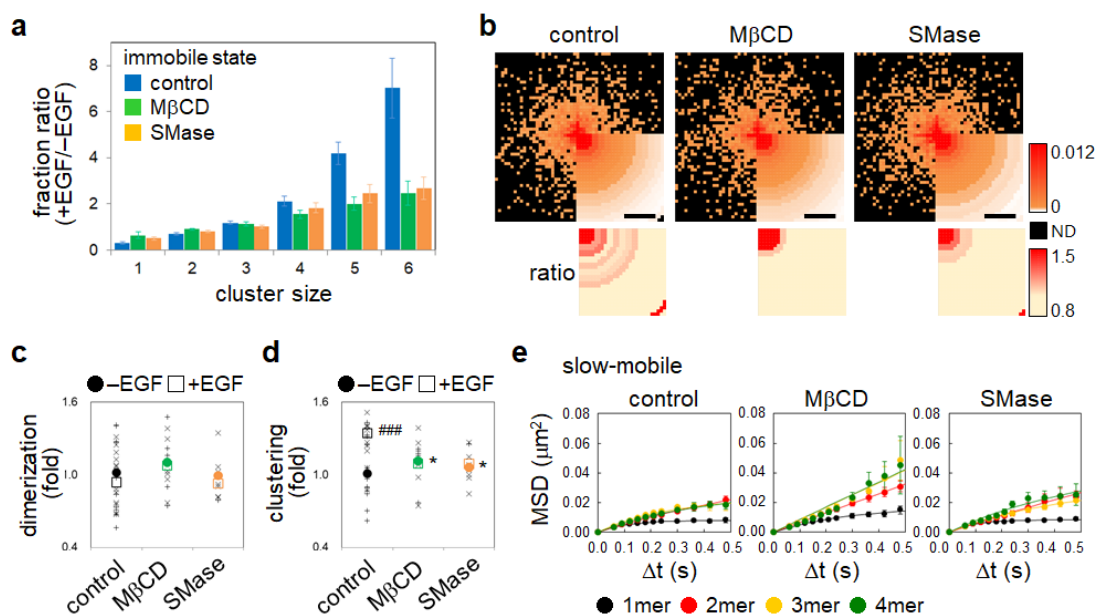

290 **Lipid-depletion and EGF induced changes in mobility and clustering.** **a.** The ratio  
 291 of immobile clusters before and after EGF stimulation. Means and SE from 153 and 25  
 292 cells for control, 69 and 21 cells for cholesterol-depletion, and 50 and 27 cells for  
 293 sphingomyelin-depletion are shown before and after the EGF stimulation, respectively.  
 294 **b.** Top, locations of EGF-induced higher-order clustering during the mobile state



295 (trajectory<sup>-1</sup> s<sup>-1</sup>) relative to the center of the first immobile region. Bottom, ratios of  
296 clustering (after:before the EGF addition). Scale bars, 500 nm. **c** and **d**. Dimerization (**c**)  
297 and higher-order clustering ( $\geq$  trimer; **d**) events as the relative fraction among the total  
298 long-traveled molecules. The fractions are normalized to control cells before the EGF  
299 stimulation. \*  $p < 0.05$  (t-test) between control and lipid-depleted conditions; ###  $p <$   
300 0.001 (t-test) between before and after EGF stimulation. **e**. MSD- $\Delta t$  plots of the slow-  
301 mobile state. Error bars: SE. All single-cell data points are shown in Fig. S4.

302

### 303 **Cholesterol- or sphingomyelin-depletion inhibited signaling to adaptor proteins.**

304 The adaptor proteins GRB2 and SHC receive signals from activated EGFR. Their SRC  
305 homology 2 (SH2) domains interact with the phosphorylated tyrosine residues of EGFR  
306 (Lowenstein et al., 1992), causing them to translocate to the plasma membrane  
307 (Hiroshima et al., 2018; Yoshizawa et al., 2021) and result in the tyrosine  
308 phosphorylation of SHC. We conducted single-molecule imaging of GRB2-HaloTag  
309 labeled with tetramethylrhodamine (TMR) and a Western blotting analysis of SHC  
310 (p52SHC) phosphorylation in EGFR-GFP expressing cells. The number of GRB2  
311 molecules on the plasma membrane (Fig. 5a and S9a) increased after EGF stimulation  
312 2.5-fold in the control condition. Under cholesterol- and sphingomyelin-depletion, the  
313 increase of translocated GRB2 molecules was 1.0- and 1.5-fold, respectively. After  
314 cholesterol- and sphingomyelin-depletion, the EGF-induced phosphorylation of SHC  
315 Tyr 317 residue (Fig. 5b and S9b) was decreased to  $0.73 \pm 0.07$ - and  $0.78 \pm 0.08$ -fold,  
316 respectively, of the control condition (Fig. 5c). These reductions of EGFR/GRB2 and  
317 EGFR/SHC interactions by cholesterol-depletion were in contrast to the upregulated  
318 EGFR phosphorylation (Fig. 1).

319 **Cholesterol- or sphingomyelin-depletion inhibited ERK and AKT**  
320 **phosphorylation.**

321 The phosphorylation of the downstream protein ERK in the EGFR signaling was  
322 measured by time-course Western blotting and maximized 5 minutes after the EGF  
323 stimulation, which is later than the time of EGFR phosphorylation (Figs. 5d and S10a).  
324 EGF-induced ERK phosphorylation was observed in all conditions, but its level was  
325 lower with cholesterol-depletion, which is expected when considering the reduced  
326 GRB2 translocation to the plasma membrane (Fig. 5a) and SHC phosphorylation (Fig.  
327 5b and c). Unlike the adaptor proteins, the reduction of EGF-induced phosphorylation  
328 was remarkable in ERK under cholesterol-depletion. The dependency on EGF  
329 concentration was quantified for the phosphorylation of ERK and AKT, another  
330 downstream protein, 2 minutes after the stimulation (Figs. 5e and S10b). The EC<sub>50</sub>  
331 values for the control and cholesterol-depleted conditions, which were obtained by  
332 fitting the dose-response curve (see Methods), were almost the same (within  $\pm 1$  nM).  
333 The effects of the lipid depletions on the phosphorylation of AKT and ERK were  
334 evaluated 2 minutes after 30 nM EGF stimulation, which is almost the saturation  
335 condition (Figs. 5f and S10b). Although cholesterol-depletion increased the level of  
336 EGFR phosphorylation (Fig. 1e), the levels of AKT and ERK phosphorylation were  
337 significantly decreased (Fig. 5f). Sphingomyelin-depletion also lowered the levels of  
338 ERK and AKT phosphorylation, but differently, likely reflecting the specificities of the  
339 signaling pathways.

340

341

342

343 **Fig. 5**

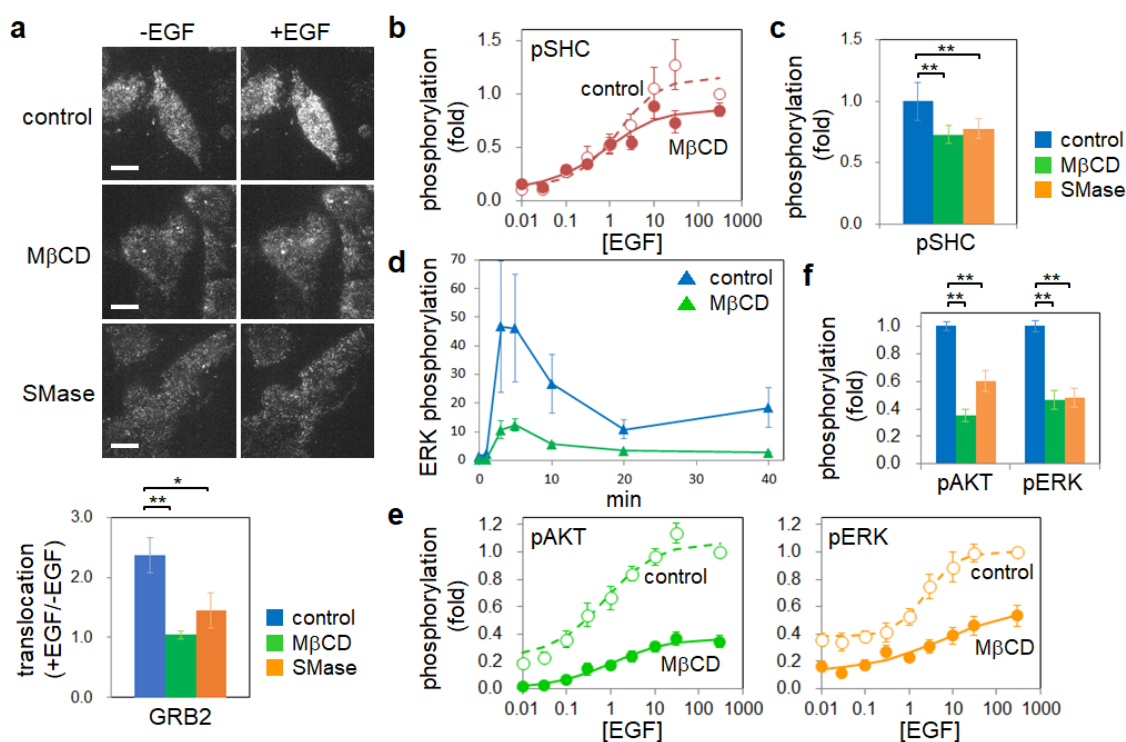

344 **Lipid-depletion and downstream signaling.** **a.** Translocation of GRB2. Top, single-  
 345 molecule images of GRB2-HaloTag::TMR on the plasma membrane. Scale bars: 10  $\mu$ m.  
 346 Bottom, the ratio of single-molecule brightness on the plasma membrane in the same  
 347 cells before and after the EGF stimulation (average of 6-8 trials). **b.** Dose-response  
 348 curves for the EGF-induced phosphorylation of SHC Y317 (average of 6 trials). **c.**  
 349 Phosphorylation levels of SHC at 30 nM EGF. **d.** Time-course of the EGF-induced  
 350 ERK phosphorylation (average of 3 trials). Fold-changes of the phosphorylation level  
 351 relative to 0 min. **e.** Dose-response curves for EGF-induced phosphorylation of  
 352 downstream proteins (average of 7 and 13 trials for AKT and ERK, respectively). **f.**  
 353 EGF-induced phosphorylation levels of AKT and ERK. \* and \*\*  $p < 0.05$  and  $p < 0.01$ ,  
 354 respectively. Error bars: SE. All data points are shown in Fig. S2b, S8, S9b, and S9c. In  
 355 **a, b,** and **e,** the phosphorylation was measured 2 min after 30 nM EGF stimulation.

356

## 357 **Discussion**

358 Cholesterol and sphingomyelin are major components of the plasma membrane  
359 subdomain where EGFR has been known to accumulate. We investigated how the  
360 depletion of either component affects EGFR behavior and signaling. We confirmed that  
361 the depletion of one lipid on the plasma membrane does not affect the other (Fig. S1)  
362 (Abe et al., 2012). Therefore, the observed phenomena in the present study, including  
363 downstream signaling of EGFR, were assumed to reflect the effects of each lipid.

364 EGFR phosphorylation in the early stage of EGF stimulation was upregulated  
365 under cholesterol-depletion (Figs. 1d and e). We considered this upregulation to depend  
366 on the increased amount of EGFR pre-dimer, which hardly undergoes auto-  
367 phosphorylation but is primed for a rapid response upon EGF stimulation (Teramura et  
368 al., 2006). EGFR has three motional modes in its lateral diffusion coefficient. After  
369 cholesterol-depletion, the amount of pre-dimer increased approximately 1.4-fold  
370 primarily in the slow-mobile state. The diffusion mode of the slow-mobile state was  
371 altered from confined to simple diffusion (Fig. 2b) without a significant change in the  
372 diffusion coefficient (Fig. S3a). This observation indicates that cholesterol-depletion  
373 enabled molecules to go freely through some barrier and move long distance (~1.8 fold  
374 longer than the control during the observation time). This barrier might correspond to a  
375 physical factor that maintains spatial phase separation in the membrane to impede  
376 EGFR from moving over the subdomain border composed of cholesterol or some  
377 component interacting with cholesterol around EGFR (e.g. shell model) (Anderson,  
378 2002). Our results suggest that EGFR molecules in the slow-mobile state prefer to exist  
379 in the subdomains. Since EGFR pre-dimers were mainly present in the slow-mobile  
380 state, the disappearance of the barrier allowed them to spread over the cell surface.

381 The effect of cholesterol depletion on the affinity between EGFR protomers in  
382 the pre-dimer was considered from the rate constants of dimerization and

383 decomposition. In the slow-mobile state, the rate constant of decomposition was  
384 significantly decreased, but we did not detect a significant change in the dimerization  
385 rate constant. As a result, the affinity was increased by the cholesterol depletion. In  
386 addition, the fraction of the slow-mobile state was increased due to increased and  
387 decreased of the transition probabilities (rate constants) from the fast- to slow-mobile  
388 states and the slow- to fast-mobile states, respectively (Table S1). These two effects  
389 induced the increase in the number of slow-mobile pre-dimers under the cholesterol-  
390 depleted condition and possibly resulted in the upregulation of EGFR phosphorylation.  
391 The disappearance of the diffusion barrier for the slow-mobile state of EGFR molecules  
392 may be related to the increase of the slow-mobile fraction. It also seems likely that the  
393 stimulative effect of cholesterol-depletion on the EGFR phosphorylation (Fig. 1) was  
394 caused by the stabilization of a pre-dimer structure for the kinase activation. Recently,  
395 we found that a transmembrane (TM)-juxtamembrane (JM) peptide of EGFR forms  
396 distinct structures of dimers in nanodiscs with or without cholesterol (Maeda et al.,  
397 2021). Cholesterol suppressed the formation of the JM dimer, which can be attributed to  
398 the structure suggested for EGFR kinase activation (Arkhipov et al., 2013). On the other  
399 hand, cholesterol stabilized dimers and trimers of EGFR peptides with lower JM  
400 interactions in the nanodiscs (Maeda et al. 2021).

401         Sphingomyelin-depletion, which did not affect cholesterol, also caused  
402 significant effects on EGFR in the slow-mobile state. The confinement length for the  
403 slow-mobile state was increased, though the confinement did not disappear (Fig. 2b).  
404 The fraction of the slow-mobile state was increased (Fig. S3b), reflecting the rise in the  
405 transition probability from the fast- to slow-mobile states (Table S1). The fractions of  
406 the monomer and other clusters in the slow-mobile state were unchanged.  
407 Sphingomyelin-depletion is likely to disrupt PIP<sub>2</sub> domains, which locate at the  
408 cytoplasmic side of the sphingomyelin domains on the extracellular side of the plasma  
409 membrane (Abe et al., 2012). PIP<sub>2</sub> facilitates dimer formation of the JM region of

410 EGFR (Arkhipov et al., 2013; Maeda et al., 2018), and disruption of the PIP<sub>2</sub> domain  
411 can cause EGFR monomerization. This disruption may be the reason for the unchanged  
412 pre-dimer fraction despite the increase in the slow-mobile state.

413 EGFR clusters larger than dimers were also formed before the EGF stimulation  
414 (pre-clusters). Different from pre-dimers, cholesterol-depletion did not increase the pre-  
415 cluster fraction (Fig. 3a), although the confinement disappeared (Fig. 2b) to enlarge the  
416 regions of the slow-mobile motions for the pre-clusters (Fig. 2c). On the contrary, the  
417 EGF-induced formation of higher-order clusters, which was observed in the control  
418 condition, was suppressed under cholesterol-depletion (Fig. 4a and 4b) in a cholesterol  
419 dose-dependent manner (Fig. S8b). Sphingomyelin-depletion also suppressed the EGF-  
420 induced clustering of EGFR. These lipid dependencies suggest that the clustering of  
421 EGFR is caused by a mechanism different from that for EGF-induced dimerization.  
422 Cholesterol and sphingomyelin may pack and enclose the EGFR molecules in small  
423 membrane subdomains or directly bind up the molecules. The oligomerization of TM  
424 peptides of EGFR has been observed in liposomes containing cholesterol (Jones et al.,  
425 1998). Following our previous report that the EGF-induced EGFR clusters in the  
426 immobile state are the primary interaction sites with the adaptor protein GRB2  
427 (Hiroshima et al., 2018), the deficient clustering by the lipid depletion correlated with  
428 the reduction in the membrane translocation and in the phosphorylation of adaptor  
429 proteins (Fig. 5a and b). Indeed, the downstream proteins ERK and AKT showed  
430 reduced phosphorylation (Fig. 5c, 5d, and 5e), suggesting that cholesterol and  
431 sphingomyelin substantially contribute to the cellular signaling through the EGFR-  
432 immobile cluster formation.

433 Based on our observations (Fig. S11), we provide a scheme for EGFR-mediated  
434 cell signaling (Fig. 6): First, the immobile and slow-mobile states of EGFR are confined  
435 within a cholesterol- and sphingomyelin-enriched membrane subdomain (Fig. 2b). A

436 significant fraction of EGFR molecules forms pre-dimers while moving within and  
437 between the slow-mobile state; however, only cholesterol and not sphingomyelin  
438 prevents the slow-mobile EGFR from freely passing over the border and interfering  
439 with the pre-dimer formation (Fig. 3a). Then, EGF association quickly converts EGFR  
440 from a pre-dimer to kinase active dimer. Moreover, EGF facilitates the formation of  
441 clusters larger than dimers with an enlarged area of the clustering (Fig. 4b and squares  
442 in 4d). This process involves the transient expansion of EGFR-cluster (not monomer)  
443 mobility at the very early stage of the EGF stimulation (Hiroshima et al., 2018). The  
444 clustering of EGFR requires cholesterol and sphingomyelin (Fig. 4a). Tyrosine  
445 phosphorylation of EGFR, a prerequisite for the clustering, leads to immobilization  
446 (Yasui et al., 2018), though the immobilization does not require the clustering. Finally,  
447 the immobile clusters increase and principally transduce information to the downstream  
448 cell signaling.

449 Previous studies have reported both positive and negative effects of membrane  
450 cholesterol and lipid rafts in EGFR phosphorylation and downstream signaling (Chen  
451 and Resh, 2002; Fang et al., 2006; Liu et al., 2007; Zhuang et al., 2002). Here, we  
452 observed the dimerization and clustering of EGFR at single-molecule resolution and  
453 found a dichotomic effect of cholesterol, in which cholesterol suppresses the pre-  
454 dimerization of EGFR, leading to a reduction of EGF-induced phosphorylation, but  
455 assists with the EGF-induced higher-order clustering of phosphorylated EGFR to  
456 construct reaction sites for downstream signaling. This latter effect is common with  
457 sphingomyelin. The molecular mobility, dimerization/clustering, phosphorylation, and  
458 interaction with downstream molecules are intricately coupled in the process of EGFR  
459 signaling. Changes in the receptor behavior and membrane lipid environment can  
460 therefore cause variable results in the signal transduction, potentially causing the EGFR  
461 related diseases such as cell carcinomas, dyslipidemia, and so forth.

462 **Fig. 6**

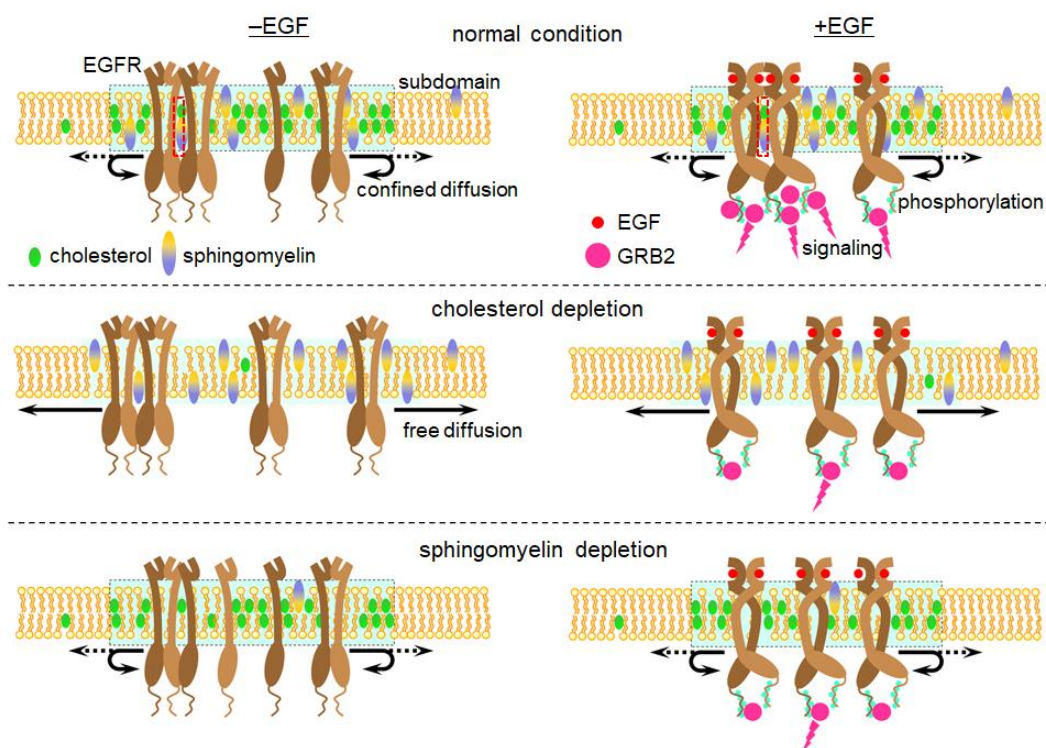

463 **Lipid-depletion and EGFR signaling.** Proposed EGFR dynamics in the slow-mobile  
464 state under control and lipid-depleted conditions. Dashed blue rectangles indicate the  
465 membrane subdomains that confine the EGFR mobility. Molecules clustered and  
466 immobilized during the slow-mobile state relay EGF-induced signaling depending on  
467 the lipid components.



468 **Acknowledgment**

469 We thank A. Yoshimura for the cDNA, H. Sato and A. Kanayama for experimental  
470 support, and P. Karagiannis for reading the manuscript. This study is supported by  
471 MEXT Japan with Grants-in-Aid for Scientific Research(B) (18H01839) and Grant-in-  
472 Aid for Scientific Research on Innovative Areas (18H05414). Y.S. was supported by  
473 MEXT Japan with Grants-in-Aid for Scientific Research (19H05647) and JST with  
474 CREST (JPMJCR1912).

475

476 **Author Contributions**

477 M.H. and Y.S. designed the research; M.H. performed the experiments and analyzed the  
478 data; M.A. purified the fluorescence probes for lipids; M.A. and A.M. directed the lipid  
479 depletion study; N.T. and F. H-M quantified cellular cholesterol; M.U. and T.K.  
480 directed the study; and M.H. and Y.S. wrote the paper.

481

482 **Declaration of Interests**

483 The authors declare no competing financial or non-financial interests.

## 484 **Materials and Methods**

### 485 **Gene Construction**

486 The EGFR-GFP plasmid was constructed using the cDNA of human *EGFR*  
487 (*pNeoSRαII*) provided by Akihiko Yoshimura (Keio University) and was inserted into  
488 the pEGFP-C1 vector (Clontech) with the same linker sequence suggested by Carter and  
489 Sorkin (Carter and Sorkin, 1998). The GFP sequence included the monomeric mutation  
490 of A206K in the enhanced GFP (EGFP) sequence. GRB2-HaloTag was constructed  
491 using the human GRB2-encoding fragment and inserted into the Halo7-C2 vector in  
492 which the monomeric EGFP sequence in the pEGFP-C2 vector (Clontech) was  
493 substituted to the Halo7 sequence from the FN19K HaloTag T7 SP6 Flexi Vector  
494 (Promega).

### 495 **Cell Culture and Transfection**

496 Chinese hamster ovary K1 (CHO-K1) cells were provided by RIKEN BRC through the  
497 National Bio-Resource Project (MEXT, Japan). For single-molecule and Western  
498 blotting experiments, a CHO cell line expressing EGFR-GFP was established. HAM  
499 F12 medium supplemented with 10% fetal bovine serum (FBS) was used to maintain  
500 the cells at 37 °C under 5% CO<sub>2</sub>.

### 501 **Cholesterol and sphingomyelin depletion**

502 To deplete cholesterol, the cells were incubated in 5 or 10 mM MβCD (Sigma C4555)  
503 in Hank's balanced salt solution (HBSS) for 1 hour at 37 °C under 5% CO<sub>2</sub>. Free  
504 cholesterol in the cells was separated by thin-layer chromatography (TLC) and  
505 quantified using gas chromatography-flame ionization detector (GC-FID, Shimadzu  
506 GC-14AH) or -mass spectrometry (GC/MS, JEOL JMS-700V). Cholesterol extent was

507 also observed under a fluorescence microscope (Nikon, Ti) with a 20X objective lens  
508 (Nikon VC 20X, NA0.75) in  $\theta$  toxin-GFP labeled cells. Sphingomyelin was depleted by  
509 incubating the cells in HBSS containing 1:300 diluted sphingomyelinase (Sigma,  
510 S9396) for 1 hour at 37 °C under 5% CO<sub>2</sub>. The depletion was confirmed by  
511 fluorescence microscopy in lysenin-GFP labeled cells. The average fluorescence  
512 intensity (per pixel) was measured over the cell region, and the averaged background  
513 intensity acquired from regions with no cells was subtracted from the signal.

#### 514 **Microscopy and Image Analysis for Single-molecule Imaging and Tracking**

515 Cell starvation was carried out by changing HAM F12 medium to modified Eagle's  
516 medium minus phenol red and FBS 1 day before single-molecule imaging. Objective-  
517 type total internal reflection illumination was applied to observe EGFR-GFP in the basal  
518 plasma membrane of the cells through a PlanApo 60× NA 1.49 objective (Nikon,  
519 Tokyo, Japan) equipped on an inverted microscope (TE2000; Nikon). Lasers with  
520 wavelengths of 488 nm (Sapphire 488; Coherent, Santa Clara, CA) and 561 nm  
521 (Sapphire 561; Coherent) were used for the excitation of GFP and TMR, respectively.  
522 The dichroic mirror and emission filter were Di02-R488 (Semrock) and FF01-525/45  
523 (Semrock) for GFP, and Di02-R561 (Semrock) and BLP02-561R (Semrock) for TMR  
524 imaging. An electron-multiplying CCD (EMCCD) camera (C9100-23; Hamamatsu,  
525 Hamamatsu, Japan), which was controlled using HCImage software, acquired  
526 fluorescence images at a frame rate of 33 s<sup>-1</sup>. The imaging was done at 25°C. Image  
527 processing was carried out with moving averages over two frames and background  
528 subtraction using rolling ball filtering (radius: 25 pixels) of the ImageJ plugins. Single-  
529 molecule tracking was performed on the processed images with custom-made software.  
530 The obtained data including positions and intensities of all fluorescent spots were  
531 analyzed using the methods described below.

532 **State Estimation Using a Hidden Markov Model with the Variational Bayes (VB-**  
533 **HMM) Method**

534 A time series of step displacements and fluorescence intensities of the EGFR-GFP spots  
535 in the single-molecule tracking data were analyzed by VB-HMM analysis. This analysis  
536 consisted of the following steps (details are given in Okamoto and Sako, 2012; Persson  
537 et al., 2013). First, the data were grouped into  $N$  number of states with the K-means  
538 clustering method. Second, the initial parameters were calculated for each group based  
539 on observation probability models describing a two-dimensional diffusion equation for  
540 the step displacement and a Gaussian function for the fluorescence intensity. Third, the  
541 posterior probability distribution,  $q(Z, \theta)$ , where  $Z$  is the molecular state sequence and  $\theta$   
542  $= \{\pi, A, \phi\}$  is the parameters of the initial values, transition matrix, and the observation  
543 probability, respectively, was factorized as  $q(Z) q(\theta)$ . Then, the distribution functions,  
544  $q(Z)$  and  $q(\theta)$ , were optimized with the VB expectation-maximization (VB-EM)  
545 algorithm. The VB-E and VB-M steps were alternately applied to optimize  $q(Z)$  with the  
546 forward-backward algorithm (Bishop, 2006) and  $q(\theta)$  by updating the parameters,  
547 which were used in the next VB-E step. Fourth, the lower bound of the evidence,  $L_q$ ,  
548 was calculated to evaluate its convergence (except for the first  $L_q$  value) by judging  
549 whether the difference from the previous  $L_q$  was less than 0.001%. Fifth, if  $L_q$  was not  
550 convergent, the next iteration was performed by repeating the third and fourth steps.  
551 Finally, the state sequence was determined by choosing the state with the highest  
552 probability at every frame.

553 **MSD for Each Mobility and Clustering State**

554 The MSD of a specific mobility and clustering state, which was attributed to steps along  
555 the receptor trajectory, was calculated as  
556  $MSD(n \cdot \delta t) = \left\{ \left[ x(n \cdot \delta t) - x(0) \right]^2 + \left[ y(n \cdot \delta t) - y(0) \right]^2 \right\}$ , where  $n$  represents the frame

557 number,  $x$  and  $y$  the particle positions,  $\delta t$  the time interval between frames (30 ms), and  
558 [ ] the average over the particles. By comparing the goodness of fit to equations for  
559 confined or simple diffusion using AIC (Eq. 4), the suitable diffusion model was  
560 determined for an MSD plot. The MSD calculation and all statistical tests were  
561 performed using Microsoft Excel.

## 562 **Translocation assay of adaptor proteins**

563 Cell lines expressing both EGFR-GFP and GRB2-HaloTag were incubated in 96-well  
564 plates and starved 1 day before the experiment. The HaloTag-fused adaptor protein was  
565 labeled with 1-4 nM (depending on the GRB2 expression level) TMR and observed  
566 with 561-nm laser light for the excitation. For large-scale single-molecule analysis with  
567 high efficiency, well plate-based measurements were performed with the automated  
568 system that we developed (Yasui et al., 2018). Each of the automatically determined 5  
569 fields of view, including 1-3 cells per field, was observed for 200 frames (6 sec) both  
570 before and 2 minutes after the EGF stimulation. The acquired images were analyzed  
571 using built-in software for tracking fluorescent spots. The spots observed in the 10th  
572 frame were used for the analysis to exclude fluorescence debris, which was bleached  
573 immediately after illumination. The number of translocated proteins on the plasma  
574 membrane was reflected in the total brightness of the fluorescent spots, in which more  
575 than one adaptor protein molecule might be included in a spot. The total brightness  
576 before and after the EGF stimulation were compared by their ratio.

## 577 **Western blot assay**

578 The phosphorylation of proteins was quantified by western blotting using antibodies  
579 against pEGFR (#4407 for pY1173 and #3777 for pY1068; Cell Signaling Technology  
580 (CST)), pSHC (CST #2431 for pY317), pERK (CST #9106), and pAKT (CST #4060)

581 to detect tyrosine or serine/threonine phosphorylation, and antibodies against EGFR  
582 (SC-03; Santacruz), SHC (CST #2432), ERK (CST #4696), and AKT (CST #9272) to  
583 detect protein expressions. Antibody binding was detected by luminescence using  
584 1:2000 diluted HRP-linked anti-IgG antibodies (CST #7074 for rabbit and CST #7076  
585 for mouse) as the secondary antibodies and ECL prime reagent (GE Healthcare). The  
586 luminescence intensities were measured using ImageJ software (NIH). Rectangular  
587 regions of interest were set in the signal (band) and background (far enough from the  
588 signal) regions. The difference in the average intensities of the two regions was defined  
589 as the band intensity. For the time-course analysis, the fold-change of the  
590 phosphorylation level at 0 min was calculated. The obtained band intensity at each time  
591 point in all conditions was normalized to that at 1 min of the control cells measured in  
592 the identical experiment. The intensity at 0 min was significantly weak, coupled with a  
593 relatively high level of noise, and not suitable as a normalization factor. Next, the  
594 normalized values at 0 min in all conditions were averaged and used as the denominator  
595 for the values at each time point. For the dose-response analysis, the obtained band  
596 intensity at each EGF concentration in all conditions was normalized to that at 300 nM  
597 EGF of the control cells measured in the identical experiment. The dose-response curve  
598 was fitted with the Hill equation as follows:

599

$$\text{phosphorylation} = \text{bottom} + \frac{\text{top} - \text{bottom}}{1 + \left( \frac{EC_{50}}{[EGF]} \right)^n}$$

600 Here,  $n$ ,  $top$ , and  $bottom$  are the fitted parameters indicating the Hill coefficient and  
601 upper and lower bounds, respectively.  $[EGF]$  is the concentration of EGF.

602 **References**

- 603 Abe, M., Makino, A., Hullin-Matsuda, F., Kamijo, K., Ohno-Iwashita, Y., Hanada, K.,  
604 Mizuno, H., Miyawaki, A., and Kobayashi, T. (2012). A role for sphingomyelin-rich  
605 lipid domains in the accumulation of phosphatidylinositol-4,5-bisphosphate to the  
606 cleavage furrow during cytokinesis. *Mol. Cell. Biol.* 32, 1396–1407.
- 607 Anderson, R.G.W. (2002). A Role for Lipid Shells in Targeting Proteins to Caveolae,  
608 Rafts, and Other Lipid Domains. *Science* (80-. ). 296, 1821–1825.
- 609 Arkhipov, A., Shan, Y., Das, R., Endres, N.F., Eastwood, M.P., Wemmer, D.E.,  
610 Kuriyan, J., and Shaw, D.E. (2013). Architecture and membrane interactions of the EGF  
611 receptor. *Cell* 152, 557–569.
- 612 Carpenter, G., King, L., and Cohen, S. (1978). Epidermal growth factor stimulates  
613 phosphorylation in membrane preparations in vitro. *Nature* 276, 409–410.
- 614 Carter, R.E., and Sorkin, A. (1998). Endocytosis of functional epidermal growth factor  
615 receptor-green fluorescent protein chimera. *J. Biol. Chem.* 273, 35000–35007.
- 616 Chen, X., and Resh, M.D. (2002). Cholesterol depletion from the plasma membrane  
617 triggers ligand-independent activation of the epidermal growth factor receptor. *J. Biol.*  
618 *Chem.* 277, 49631–49637.
- 619 Chung, I., Akita, R., Vandlen, R., Toomre, D., Schlessinger, J., and Mellman, I. (2010).  
620 Spatial control of EGF receptor activation by reversible dimerization on living cells.  
621 *Nature* 464, 783–787.

- 622 Cremesti, A.E., Goni, F.M., and Kolesnick, R. (2002). Role of sphingomyelinase and  
623 ceramide in modulating rafts: Do biophysical properties determine biologic outcome?  
624 FEBS Lett. *531*, 47–53.
- 625 Fang, Y., Ferrie, A.M., and Li, G. (2006). Cellular functions of cholesterol probed with  
626 optical biosensors. *Biochim. Biophys. Acta - Mol. Cell Res.* *1763*, 254–261.
- 627 Hannun, Y.A., and Obeid, L.M. (2008). Principles of bioactive lipid signalling: Lessons  
628 from sphingolipids. *Nat. Rev. Mol. Cell Biol.* *9*, 139–150.
- 629 Hiroshima, M., Saeki, Y., Okada-Hatakeyama, M., and Sako, Y. (2012). Dynamically  
630 varying interactions between heregulin and ErbB proteins detected by single-molecule  
631 analysis in living cells. *Proc. Natl. Acad. Sci. U. S. A.* *109*, 13984–13989.
- 632 Hiroshima, M., Pack, C. gi, Kaizu, K., Takahashi, K., Ueda, M., and Sako, Y. (2018).  
633 Transient Acceleration of Epidermal Growth Factor Receptor Dynamics Produces  
634 Higher-Order Signaling Clusters. *J. Mol. Biol.*
- 635 Hofman, E.G., Bader, A.N., Voortman, J., van den Heuvel, D.J., Sigismund, S.,  
636 Verkleij, A.J., Gerritsen, H.C., and van Bergen en Henegouwen, P.M.P. (2010). Ligand-  
637 induced EGF receptor oligomerization is kinase-dependent and enhances  
638 internalization. *J. Biol. Chem.* *285*, 39481–39489.
- 639 Jones, D.H., Barber, K.R., and Grant, C.W.M. (1998). The EGF Receptor  
640 Transmembrane Domain: 2 H NMR Study of Peptide Phosphorylation Effects in a  
641 Bilayer Environment †. *Biochemistry* *37*, 7504–7508.



- 642 Lajoie, P., Partridge, E.A., Guay, G., Goetz, J.G., Pawling, J., Lagana, A., Bharat, J.,  
643 Dennis, J.W., and Nabi, I.R. (2007). Plasma membrane domain organization regulates  
644 EGFR signaling in tumor cells. *J. Cell Biol.* *179*, 341–356.
- 645 Lemmon, M.A., and Schlessinger, J. (2010). Cell signaling by receptor tyrosine kinases.  
646 *Cell* *141*, 1117–1134.
- 647 Lin, C.Y., Huang, J.Y., and Lo, L.W. (2016). Exploring in vivo cholesterol-mediated  
648 interactions between activated EGF receptors in plasma membrane with single-molecule  
649 optical tracking. *BMC Biophys.* *9*, 1–11.
- 650 Liu, Y., Sun, R., Wan, W., Wang, J., Oppenheim, J.J., Chen, L., and Zhang, N. (2007).  
651 The involvement of lipid rafts in epidermal growth factor-induced chemotaxis of breast  
652 cancer cells. *Mol. Membr. Biol.* *24*, 91–101.
- 653 Low-Nam, S.T., Lidke, K. a, Cutler, P.J., Roovers, R.C., van Bergen en Henegouwen,  
654 P.M.P., Wilson, B.S., and Lidke, D.S. (2011). ErbB1 dimerization is promoted by  
655 domain co-confinement and stabilized by ligand binding. *Nat. Struct. Mol. Biol.* *18*,  
656 1244–1249.
- 657 Lowenstein, E.J., Daly, R.J., Batzer, A.G., Li, W., Margolis, B., Lammers, R., Ullrich,  
658 A., Skolnik, E.Y., Bar-Sagi, D., and Schlessinger, J. (1992). The SH2 and SH3 domain-  
659 containing protein GRB2 links receptor tyrosine kinases to ras signaling. *Cell* *70*, 431–  
660 442.
- 661 Maeda, R., Sato, T., Okamoto, K., Yanagawa, M., and Sako, Y. (2018). Lipid-Protein  
662 Interplay in Dimerization of Juxtamembrane Domains of Epidermal Growth Factor  
663 Receptor. *Biophys. J.* *114*, 893–903.

- 664 Maeda, R., Tamagaki-asahina, H., Sato, T., and Yanagawa, M. (2021). Threonine  
665 phosphorylation regulates the molecular assembly and signaling of EGFR in  
666 cooperation with membrane lipids. 1–33.
- 667 Makdissy, N., Haddad, K., Mouawad, C., Popa, I., Younsi, M., Valet, P., Brunaud, L.,  
668 Ziegler, O., and Quilliot, D. (2015). Regulation of SREBPs by sphingomyelin in  
669 adipocytes via a caveolin and Ras-ERK-MAPK-CREB signaling pathway. *PLoS One*  
670 *10*, 1–33.
- 671 Martin-Fernandez, M., Clarke, D.T., Tobin, M.J., Jones, S. V, and Jones, G.R. (2002).  
672 Preformed oligomeric epidermal growth factor receptors undergo an ectodomain  
673 structure change during signaling. *Biophys. J.* *82*, 2415–2427.
- 674 Okamoto, K., and Sako, Y. (2012). Variational Bayes analysis of a photon-based hidden  
675 Markov model for single-molecule FRET trajectories. *Biophys. J.* *103*, 1315–1324.
- 676 Persson, F., Lindén, M., Unoson, C., and Elf, J. (2013). Extracting intracellular  
677 diffusive states and transition rates from single-molecule tracking data. *Nat. Methods*  
678 *10*, 265–269.
- 679 Rabiner, L.R. (1989). A tutorial on hidden Markov models and selected applications in  
680 speech recognition. *Proc. IEEE* *77*, 257–286.
- 681 Sasset, L., Zhang, Y., Dunn, T.M., and Di Lorenzo, A. (2016). Sphingolipid De Novo  
682 Biosynthesis: A Rheostat of Cardiovascular Homeostasis. *Trends Endocrinol. Metab.*  
683 *27*, 807–819.
- 684 Semrau, S., and Schmidt, T. (2009). Membrane heterogeneity - From lipid domains to  
685 curvature effects. *Soft Matter* *5*, 3174–3186.

- 686 Smith, A.J., Sugita, S., and Charlton, M.P. (2010). Cholesterol-dependent kinase  
687 activity regulates transmitter release from cerebellar synapses. *J. Neurosci.* *30*, 6116–  
688 6121.
- 689 Tabas, I. (2002). Consequences of cellular cholesterol accumulation: Basic concepts and  
690 physiological implications. *J. Clin. Invest.* *110*, 905–911.
- 691 Tao, R.-H., and Maruyama, I.N. (2008). All EGF(ErbB) receptors have preformed  
692 homo- and heterodimeric structures in living cells. *J. Cell Sci.* *121*, 3207–3217.
- 693 Teramura, Y., Ichinose, J., Takagi, H., Nishida, K., Yanagida, T., and Sako, Y. (2006).  
694 Single-molecule analysis of epidermal growth factor binding on the surface of living  
695 cells. *EMBO J.* *25*, 4215–4222.
- 696 Valley, C.C., Arndt-Jovin, D.J., Karedla, N., Steinkamp, M.P., Chizhik, A.I., Hlavacek,  
697 W.S., Wilson, B.S., Lidke, K.A., and Lidke, D.S. (2015). Enhanced dimerization drives  
698 ligand-independent activity of mutant epidermal growth factor receptor in lung cancer.  
699 *Mol. Biol. Cell* *26*, 4087–4099.
- 700 Webb, S.E.D., Roberts, S.K., Needham, S.R., Tynan, C.J., Rolfe, D.J., Winn, M.D.,  
701 Clarke, D.T., Barraclough, R., and Martin-Fernandez, M.L. (2008). Single-molecule  
702 imaging and fluorescence lifetime imaging microscopy show different structures for  
703 high- and low-affinity epidermal growth factor receptors in A431 cells. *Biophys. J.* *94*,  
704 803–819.
- 705 Yasui, M., Hiroshima, M., Kozuka, J., Sako, Y., and Ueda, M. (2018). Automated  
706 single-molecule imaging in living cells. *Nat. Commun.* *9*.

- 707 Yoshizawa, R., Umeki, N., Yamamoto, A., Murata, M., and Sako, Y. (2021). Biphasic  
708 spatiotemporal regulation of GRB2 dynamics by p52SHC for transient RAS activation.  
709 *Biophys. Physicobiology* *18*, 1–12.
- 710 Yu, X., Sharma, K.D., Takahashi, T., Iwamoto, R., and Mekada, E. (2002). Ligand-  
711 independent dimer formation of epidermal growth factor receptor (EGFR) is a step  
712 separable from ligand-induced EGFR signaling. *Mol. Biol. Cell* *13*, 2547–2557.
- 713 Zhuang, L., Lin, J., Lu, M.L., Solomon, K.R., and Freeman, M.R. (2002). Cholesterol-  
714 rich lipid rafts mediate Akt-regulated survival in prostate cancer cells. *Cancer Res.* *62*,  
715 2227–2231.
- 716 Zidovetzki, R., and Levitan, I. (2007). Use of cyclodextrins to manipulate plasma  
717 membrane cholesterol content: evidence, misconceptions and control strategies.  
718 *Biochim. Biophys. Acta* *1768*, 1311–1324.
